# Supplementary material
Source: ML conference proceedings conference paper supplement (https://openreview.net/forum?id=6gEyD5zg0dt)
Supplement: supplementary_material [file attachment]

## A Appendix

### A.1 Experimental Details

All experiments were performed on an Alienware-Aurora-R9 with 8 Intel i7-9700 cores. We did not use a GPU. Code for the experiments is provided in the supplementary materials

#### A.1.1 Discrete Case

We perform 1000 episodes, using trajectories of 30 steps, a  $k$  of 8, and a  $\gamma$  of 0.825. Our learning rate begins at 0.01 and decays as  $O(n^{-\frac{3}{4}})$ .

#### A.1.2 For all continuous-space experiments

NNS: We use four-layer neural nets with RELU activations and 256 hidden units for both the actor and critic networks

Optimizer: Adam with default params

Learning rate: .001 for both actor and critic

Polyak averaging coefficient: .95

K (number of hindsight goals per non-hindsight goal): 8

Batch-size: 256

$\alpha_Q$ : 0.1

$\alpha_f$ : 0.5

#### *N-torus with Freeze*

In this environment, robots move on a unit torus with a 4-dimensional surface 14. The robot can move up to 0.05 units in any direction on the surface. Alternatively, robots can take the "Freeze" action which randomly teleports them to a random location on the surface and permanently breaks the robot so it cannot move. The goal space is the 4-dimensional unit cube. The state space is the Cartesian product of the 4-dimensional unit cube with a boolean ( $\mathbb{R}^4 \times [True, False]$ ). The boolean represents whether the robot is broken. Because this is a torus, the space loops around on itself as a torus would – robots that would move off the positive edge of any axis loop around and appear on the negative edge. The action is a 5-dimensional vector in the range  $[-1, 1]$ . The first four dimensions indicate the direction and distance to move, and the last axis indicates the probability with which to take the "freeze" action. Positive values are interpreted as a probability of taking the freeze action, and negative values are interpreted as "0 probability of taking the freeze action". We chose to make this value a scalar rather than a discrete value, because DDPG and SAC assume a continuous action space.

For the Torus with Freeze environment, we increase the ratio clipping factor  $c$  from 0.3 to 10, allowing the importance sampling weight to go as high as 11 and as low as  $\frac{1}{11}$ . We do this because the Freeze action was designed as a pathological counterexample to HER, and therefore the weights required to correct for its bias can be significantly higher than for more naturalistic environments.

Although this environment is very non-physical, it is the only benchmark we are aware of that assesses the bias of HER variants. For this reason, we felt reporting results with it was necessary.

$\gamma$  : .98

Trajectory length: 50

Batches per epoch: 4

Episodes per epoch: 500

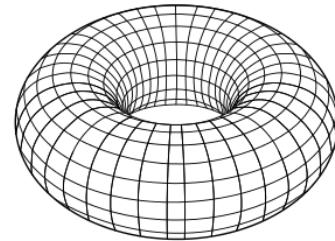

Figure 10: A Torus with a 2-dimensional surface

Entropy Regularization: 0.001

*Car with Random Noise*

$\gamma$  : .95

Trajectory length: 20

Batches per epoch: 5

Episodes per epoch: 500

Entropy Regularization: 0.01

*RedLight*

The yellow tile in the figure represents the intersection that is dangerous during red lights.

$\gamma$  : .9

Trajectory length: 50

Batches per epoch: 4

Episodes per epoch: 500

Entropy Regularization: 0.01

The light pattern was green: 1 second, yellow: 1 second, red: 4 seconds, with a randomized starting color. *FetchReach*

$\gamma$  : .98

Trajectory length: 50

Batches per epoch: 40

Episodes per epoch: 50

Entropy Regularization: 0.001

*FetchPush*

$\gamma$  : .98

Trajectory length: 50

Batches per epoch: 40

Episodes per epoch: 50

Entropy Regularization: 0.01

*FetchSlide*

$\gamma$  : .98

Trajectory length: 50

Batches per epoch: 40

Episodes per epoch: 50

Entropy Regularization: 0.001

*Mobile Throwing Robot*

$\gamma$  : .9

Trajectory length: 20

Batches per epoch: 100

Episodes per epoch: 50

Entropy Regularization: 0.001

*Mechanum robot – simulator*

$\gamma$  : .925

Trajectory length: 50

Batches per epoch: 100

Episodes per epoch: 50

Entropy Regularization: 0.01

*Mechanum robot – analytic model*

$\gamma$  : .975

Trajectory length: 50

Batches per epoch: 10

Episodes per epoch: 50

Entropy Regularization: 0.01

Importance weight clipping value: 100

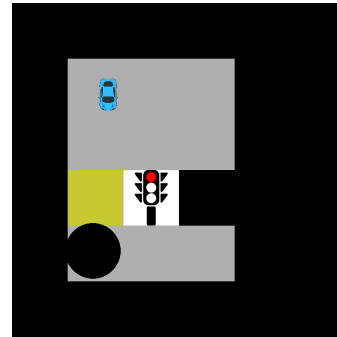

Figure 11: Red Light Environment

Our USHER and HER implementations are based on Tianhong Dai’s implementation [16].

### A.2 Additional Experiments

Due to space limitations, we were not able to include all of our experimental results. We have included these additional results here. We first trained the mechanum robot in simulation before transferring it to a real-world robot. Here are the training curves for the robot that was trained in simulation.

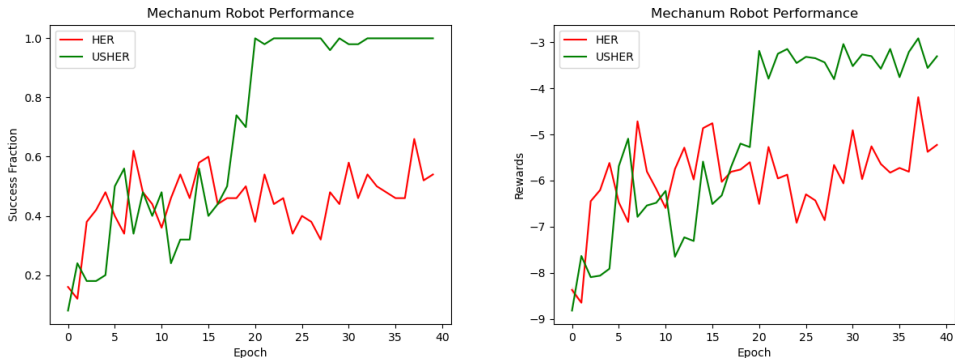

Figure 12: USHER performance with weight clipping (left) and without weight clipping (right)

### A.3 Hyperparameter analysis

Here, we include an analysis of the performance of USHER as  $\alpha_Q$  and  $\alpha_f$  vary. We evaluated USHER’s success rate on FetchReach after 30 episodes of training.

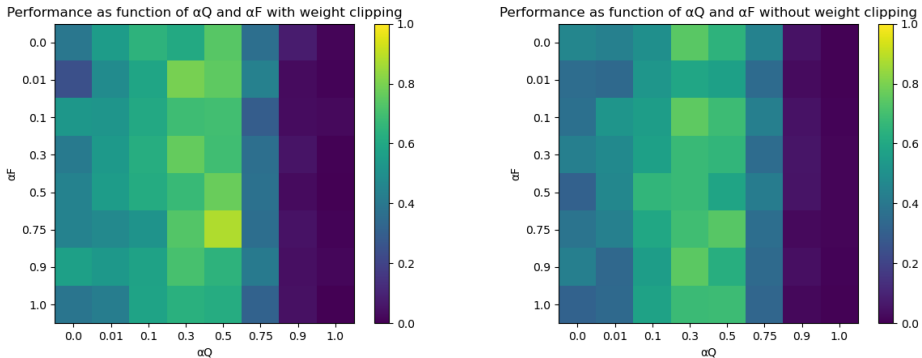

Figure 13: USHER performance with weight clipping (left) and without weight clipping (right)

Observe that the maximum value of  $W_{\alpha_Q}$  is at most  $\frac{1}{\alpha_Q}$ . This means that for small values of  $\alpha_Q$ ,  $W_{\alpha_Q}$  can potentially take on very large values, which can be a source of variance that harms USHER’s performance. For large values of  $\alpha_Q$ , hindsight goals have much less weight than random goals, which undercuts the source of HER’s sample efficiency. For this reason, the best values of  $\alpha_Q$  lie in the low-to-mid ranges, between  $\alpha_Q = 0.1$  and  $\alpha_Q = 0.5$ . This seems to hold true for both clipped and unclipped weights. The selection of  $\alpha_f$  mattered much less. We suspect this is because variance in the  $Q$  function matters more than variance in the future goal distribution, as we have to backpropagate through the  $Q$  value to get the policy gradient.

We did not carefully tune  $\alpha_Q$  or  $\alpha_f$  for our experiments. We simply guessed at a value of  $\alpha_Q = 0.01$  and  $\alpha_f = 0.5$  and used these values for all experiments. For  $c$ , we selected the value of 0.3 by trying a range of values from 0.1 to 10 on a sample environment similar to the stochastic car environment (6.2), but using simple displacement actions instead of dynamics that require numerical integration. We found that for  $c > 1$  the bias induced by clipping was negligible.

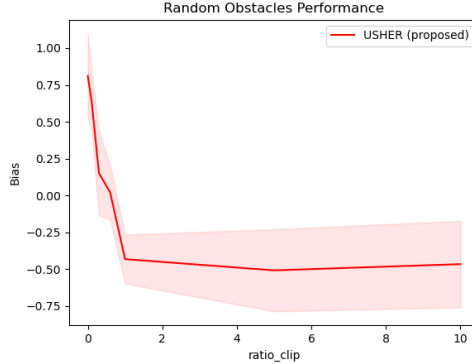

Figure 14: Bias as a function of the clipping parameter  $c$

We found  $c = 0.3$  worked well, so we used it for all experiments, except where the environment induced a very strong HER bias, in which case we set  $c$  high enough that clipping was effectively turned off.

#### A.4 Implementation

An implementation of USHER and our experiments can be found at: [https://anonymous.4open.science/r/USHER\\_CoRL-0E16/README.md](https://anonymous.4open.science/r/USHER_CoRL-0E16/README.md)

#### A.5 Goal Selection Probability

##### Proposition 1:

Suppose  $g_\pi$  is fixed at the start of the trajectory, and  $g_r$  is sampled using HER. Then for any  $s', s, a, g_r, g_\pi, T$ ,

$$f(s' | s, a, g_r, g_\pi, T) = \frac{f(g_r | s', \pi(s', g_\pi), g_\pi, T - 1)}{f(g_r | s, a, g_\pi, T)} f(s' | s, a)$$

*Proof.* Suppose  $g_\pi$  is sampled before the trajectory begins, and is not changed at training time. Let  $s, a$ , and  $s'$  be random variables representing a state, action, and subsequent state. Let  $Q_{HER}^\pi(s, a, g_r, g_\pi)$  be the solution to the Bellman equation obtained using HER’s sampling bias, with state  $s$ , hindsight goal  $g_r$ , policy goal  $g_\pi$ , and deterministic policy  $\pi(s', g_\pi)$ . Let  $t_s$  be the number of steps remaining in the trajectory when state  $s$  is sampled,  $t'_s$  be the number of steps remaining in the trajectory when state  $s'$  is sampled, and  $T$  be an integer

$$\begin{aligned}
f(s' | s, a, g_r, g_\pi, t_s = T) &= \frac{f(s', s, a, g_r, g_\pi, t_s = T)}{f(s, a, g_r, g_\pi, t_s = T)} \\
&= \frac{f(g_r | s', s, a, g_\pi, t_s = T) f(s', s, a, g_\pi, t_s = T)}{f(s, a, g_r, g_\pi, t_s = T)} \\
&= \frac{f(g_r | s', s, a, g_\pi, t_s = T) f(s' | s, a, g_\pi, t_s = T) f(s, a, g_\pi, t_s = T)}{f(g_r | s, a, g_\pi, t_s = T) f(s, a, g_\pi, t_s = T)} \\
&= f(s' | s, a, g_\pi, t_s = T) \frac{f(g_r | s', s, a, g_\pi, t_s = T)}{f(g_r | s, a, g_\pi, t_s = T)}
\end{aligned}$$

Observe that with HER,  $g_r$  is either selected from the trajectory beginning with  $s'$ , sampled independently of  $s'$  or left the same as the original goal given to the policy. In all three cases,  $f(g_r | s', s, a, g_\pi, t_s = T) = f(g_r | s', g_\pi, t_s = T)$ . In the first case where  $g_r$  comes from the future trajectory, the Markov property implies that given the most recent observed state  $s'$ ,  $g_r$  is independent of all earlier states and actions, including  $s$  and  $a$ , so  $f(g_r | s', s, a, g_\pi, t_s = T) = f(g_r | s', g_\pi, t_s = T)$ . In the second case where  $g_r$  is sampled independently of the trajectory, so  $f(g_r | s', s, a, g_\pi, t_s = T) = f(g_r) = f(g_r | s', g_\pi, t_s = T)$ . In the third case,  $g_r = g_\pi$ , so  $g_r$  has no dependence on  $s, a$ , or  $s'$ . In any case,  $f(g_r | s', s, a, g_\pi, t_s = T) = f(g_r | s', g_\pi, t_s = T)$ .

For the same reason that  $g_r$  depends only upon  $s'$  and not on  $s$  when  $s'$  is known,  $g_r$  depends only on  $t_{s'}$  and not  $t_s$  when  $t_{s'}$  is known. Thus we find that  $f(g_r | s', g_\pi, t_s = T) = f(g_r | s', g_\pi, t_{s'} = T - 1)$ .

$$\begin{aligned}
f(s' | s, a, g_\pi, g_r, t_s = T) &= f(s' | s, a, g_\pi, t_s = T) \frac{f(g_r | s', g_\pi, t_{s'} = T - 1)}{f(g_r | s, a, g_\pi, t_s = T)} \\
&= f(s' | s, a, g_\pi, t_s = T) \frac{E_{a'}[f(g_r | s', a', g_\pi, t_{s'} = T - 1) | s' g_\pi]}{f(g_r | s, a, g_\pi, t_s = T)} \\
&= f(s' | s, a, g_\pi, t_s = T) \frac{f(g_r | s', \pi(s', g_\pi), g_\pi, t_{s'} = T - 1)}{f(g_r | s, a, g_\pi, t_s = T)}
\end{aligned}$$

Observe that from the Markov assumption of the environment, the transition probability depends only on  $s, a$ , and does not depend on  $g_\pi$  nor  $t_s$ .  $g_\pi$  is sampled before the trajectory begins, independently of all other random variables. From this we can see that  $f(s' | s, a)$  is independent of  $g_\pi$  and  $t_s$ .

We can then conclude that for all  $g_r, g_\pi$

$$f(s' | s, a, g_\pi, g_r, t_s = T) = f(s' | s, a) \frac{f(g_r | s', \pi(s', g_\pi), g_\pi, t_{s'} = T - 1)}{f(g_r | s, a, g_\pi, t_s = T)}$$

For conciseness, we will abbreviate this to

$$f(s' | s, a, g_\pi, g_r, T) = f(s' | s, a) \frac{f(g_r | s', \pi(s', g_\pi), g_\pi, T - 1)}{f(g_r | s, a, g_\pi, T)}$$

□

## A.6 2-goal HER is asymptotically unbiased

**Corollary.** *Suppose  $Q_{HER}^\pi(s, a, g_\pi, g_\pi)$  satisfies the Bellman equation and the distribution of future achieved goals is absolutely continuous with respect to the goal space. Then  $Q_{HER}^\pi(s, a, g_\pi, g_\pi) = Q^*(s, a, g_\pi)$  for all  $s, a, g_\pi$ , where  $Q^*(s, a, g_\pi)$  is the optimal goal-conditioned  $Q$  function.*

*Proof.* Suppose that the distribution of future achieved goals is absolutely continuous with respect to the goal space. Furthermore, suppose the goal space is a continuous space of at least one dimension. Then the probability of arriving exactly at any given goal  $g_r$  given the policy goal  $g_\pi$  is infinitesimal. This means that the only time there is a non-zero probability of having  $g_r = g_\pi$  is when  $g_r$  is not drawn from the distribution of future achieved goals and HER instead uses the same goal as during the data-gathering phase.

Let  $P(g_r = g_\pi \mid s, a, g_\pi)$  be the probability that  $g_\pi$  is selected as the reward goal. Then

$$\begin{aligned} P(g_r = g_\pi \mid s, a, g_\pi, T) &= P(g_r = g_\pi \mid s, a, g_\pi, T, H)P(H) \\ &\quad + P(g_r = g_\pi \mid s, a, g_\pi, T, \neg H)P(\neg H) \\ &= P(g_r = g_\pi \mid s, a, g_\pi, T, H)P(H) + 1P(\neg H) \end{aligned}$$

Since  $P(g_r = g_\pi \mid s, a, g_\pi, H)$  is infinitesimal and  $P(\neg H)$  is not, this reduces to

$$P(g_r = g_\pi \mid s, a, g_\pi, T) = P(\neg H) = \frac{1}{k+1}$$

Thus,

$$\begin{aligned} Q_{HER}^\pi(s, a, g_\pi, g_\pi) &= E_{s'} \left[ \frac{P(g_r = g_\pi \mid s', \pi(s', g_\pi), g_\pi, T)}{P(g_r = g_\pi \mid s, a, g_\pi, T)} \right. \\ &\quad \left. (R(s', g_\pi) + \gamma Q_{HER}^\pi(s', \pi(s', g_\pi), g_\pi, g_\pi)) \mid s, a, g_r, g_\pi, T \right] \\ &= E_{s'} \left[ \frac{1/(k+1)}{1/(k+1)} \right. \\ &\quad \left. (R(s', g_\pi) + \gamma Q_{HER}^\pi(s', \pi(s', g_\pi), g_\pi, g_\pi)) \mid s, a, g_r, g_\pi, T \right] \\ &= E_{s'} [(R(s', g_\pi) + \gamma Q_{HER}^\pi(s', \pi(s', g_\pi), g_\pi, g_\pi)) \mid s, a, g_r, g_\pi, T] \end{aligned}$$

Now, observe that  $Q_{HER}^\pi(s, a, g_\pi, g_\pi)$  satisfies the one-goal Bellman equation. Since the Bellman equation has a unique solution, and  $Q^*(s, a, g)$  is a solution,  $Q_{HER}^\pi(s, a, g_\pi, g_\pi) = Q^*(s, a, g_\pi)$ .  $\square$

## A.7 Importance Sampling for Mixed Sampling Method

### Proposition 2:

Let  $W(s', s, a, g_r, g_\pi, T) = \frac{f(g_r \mid s, a, g_\pi, T)}{\alpha f(g_r \mid s, a, g_\pi, T) + (1-\alpha)f(g_r \mid s', \pi(s', g_\pi), g_\pi, T)}$ . Let  $\alpha$  be a real value in the range  $(0, 1]$ . Then for any  $s', s, a, g_r, g_\pi$ ,

$$f(s' \mid s, a) = W(s', s, a, g_r, g_\pi, T)(\alpha f(s' \mid s, a) + (1-\alpha)f(s' \mid s, a, g_\pi, g_r, T))$$

Furthermore, for any function  $F$  of the state  $s'$ ,

$$\begin{aligned} \mathbb{E}_{s'} [F(s') \mid s, a] &= \alpha \mathbb{E}_{s'} [W(s', s, a, g_r, g_\pi, T)F(s') \mid s, a] \\ &\quad + (1-\alpha) \mathbb{E}_{s'} [W(s', s, a, g_r, g_\pi, T)F(s') \mid s, a, g_\pi, g_r, T] \end{aligned}$$

*Proof.* Let  $g_r, g_\pi, T$  be a reward goal, a policy goal, and the remaining steps left in the current trajectory, respectively Using Proposition 1, we can show that

$$\begin{aligned}
f(s' | s, a) &= f(s' | s, a) \frac{\alpha f(s' | s, a) + (1 - \alpha) f(s' | s, a, g_\pi, g_r, T)}{\alpha f(s' | s, a) + (1 - \alpha) f(s' | s, a, g_\pi, g_r, T)} \\
&= (\alpha f(s' | s, a) + (1 - \alpha) f(s' | s, a, g_\pi, g_r, T)) \\
&\quad \frac{f(s' | s, a)}{\alpha f(s' | s, a) + (1 - \alpha) f(s' | s, a, g_\pi, g_r, T)} \\
&= (\alpha f(s' | s, a) + (1 - \alpha) f(s' | s, a, g_\pi, g_r, T)) \\
&\quad \frac{f(s' | s, a)}{\alpha f(s' | s, a) + (1 - \alpha) \frac{f(g_r | s', \pi(s', g_\pi), g_\pi, T)}{f(g_r | s, a, g_\pi, T)} f(s' | s, a)} \\
&= (\alpha f(s' | s, a) + (1 - \alpha) f(s' | s, a, g_\pi, g_r, T)) \\
&\quad \frac{1}{\alpha + (1 - \alpha) \frac{f(g_r | s', \pi(s', g_\pi), g_\pi, T)}{f(g_r | s, a, g_\pi, T)}} \\
&= (\alpha f(s' | s, a) + (1 - \alpha) f(s' | s, a, g_\pi, g_r, T)) \\
&\quad \frac{f(g_r | s, a, g_\pi, T)}{\alpha f(g_r | s, a, g_\pi, T) + (1 - \alpha) f(g_r | s', \pi(s', g_\pi), g_\pi, T)} \\
&= (\alpha f(s' | s, a) + (1 - \alpha) f(s' | s, a, g_\pi, g_r, T)) \\
&\quad W(s', s, a, g_r, g_\pi, T)
\end{aligned}$$

It then follows that for any  $g_r, g_\pi, T$ , the expectation value  $\mathbb{E}_{s'}[F(s') | s, a]$  may be written as follows:

$$\begin{aligned}
\mathbb{E}_{s'}[F(s') | s, a] &= \int_S f(s' | s, a) F(s') ds' \\
&= \int_S (\alpha f(s' | s, a) + (1 - \alpha) f(s' | s, a, g_\pi, g_r, T)) \\
&\quad W(s', s, a, g_r, g_\pi, T) F(s') ds' \\
&= \int_S (\alpha f(s' | s, a) + (1 - \alpha) f(s' | s, a, g_\pi, g_r, T)) \\
&\quad W(s', s, a, g_r, g_\pi, T) F(s') ds' \\
&= \alpha \int_S f(s' | s, a) W(s', s, a, g_r, g_\pi, T) F(s') ds' \\
&\quad + (1 - \alpha) \int_S f(s' | s, a, g_\pi, g_r, T) W(s', s, a, g_r, g_\pi, T) F(s') ds' \\
&= \alpha \mathbb{E}_{s'}[W(s', s, a, g_r, g_\pi, T) F(s') | s, a] \\
&\quad + (1 - \alpha) \mathbb{E}_{s'}[W(s', s, a, g_r, g_\pi, T) F(s') | s, a, g_r, g_\pi, T] \\
&= \alpha \mathbb{E}_{s'}[W(s', s, a, g_r, g_\pi, T) F(s') | s, a] \\
&\quad + (1 - \alpha) \mathbb{E}_{s'}[W(s', s, a, g_r, g_\pi, T) F(s') | s, a, g_r, g_\pi, T]
\end{aligned}$$

□
